# Supplementary material for: Contemporary percutaneous management of coronary calcification: current status and future directions
Source: PubMed Central journal article supplement — Open Heart. 2023 Feb 16;10(1):e002182. doi: 10.1136/openhrt-2022-002182 (PMC9936324; doi:10.1136/openhrt-2022-002182), 2023-02-16
Supplement: openhrt-2022-002182supp001.pdf [file openhrt-2022-002182supp001.pdf]

**Table 1.** Imaging modalities for assessing coronary calcium

|                               | CT                                                                                       | ICA                                                                | IVUS                                            | OCT                                                                    |
|-------------------------------|------------------------------------------------------------------------------------------|--------------------------------------------------------------------|-------------------------------------------------|------------------------------------------------------------------------|
| <b>Overall sensitivity</b>    | ++                                                                                       | +                                                                  | +++                                             | +++                                                                    |
| <b>Circumferential arc</b>    | ++                                                                                       | -                                                                  | +++                                             | +++                                                                    |
| <b>Depth / thickness</b>      | +                                                                                        | +                                                                  | +                                               | +++                                                                    |
| <b>Longitudinal extension</b> | ++                                                                                       | +                                                                  | +++                                             | +++                                                                    |
| <b>Non-invasiveness</b>       | +++                                                                                      | +                                                                  | -                                               | -                                                                      |
| <b>Specific advantages</b>    | Useful for preprocedural planning of CT                                                  | Standard study (availability)                                      | Guidance for calcium-directed therapies         | Guidance for calcium-directed therapies                                |
| <b>Specific disadvantages</b> | Additional contrast and radiation.<br>Blooming artefact may over estimate calcium extent | Definition affected by body mass.<br>Calcium often underestimated. | Calcium thickness can be challenging to assess. | Additional contrast required.<br>Coronary ostia challenging to assess. |

Legend. Summary of sensitivity of available imaging modalities for the assessment of coronary calcium and their specific advantages and disadvantages.

**Table 2.** Comparison of Outcomes of Adjunctive Technologies

| Technology                    | Procedural Success | Dissection | Perforation | Slow Reflow | MACE                       | TVR                        | Specific Considerations |
|-------------------------------|--------------------|------------|-------------|-------------|----------------------------|----------------------------|-------------------------|
| <b>RA</b> <sup>59-67</sup>    | 92.5-100%          | 1.7-5.9%   | 0.5-2.0%    | 0-2.6%      | 6-30.1%<br>(6-49 months)   | 2.8-35.7%<br>(6-49 months) | -                       |
| <b>OA</b> <sup>74 76 77</sup> | 97.7-98%           | 0.7-12%    | 0.7-1.8%    | 0-0.7%      | 1.7-16.4%<br>(1-12 months) | 0.7%<br>(12 months)        | -                       |
| <b>LA</b> <sup>92 93 94</sup> | 77.2%              | 4.3-6.9%   | 1.3-1.7%    | -           | 4.3-36.8%<br>(12 months)   | 46%<br>(12 months)         | Thermal overheating     |
| <b>IVL</b> <sup>95 96</sup>   | 95%                | 0%         | 0%          | 0%          | 5%<br>(6 months)           | 0%<br>(6 months)           | -                       |

Legend. Summary of complications and outcomes of adjunctive calcium modification technologies.

**Table 3.** Comparison of Characteristics of Adjunctive Therapies for Calcium Modification

| Technology | Compatibility                           | Guidewire | Ease of Use | Superficial Ca+ | Deep Ca+ | Fibro-calcific | Ca+ Nodule | Crossability |
|------------|-----------------------------------------|-----------|-------------|-----------------|----------|----------------|------------|--------------|
| <b>RA</b>  | 6 Fr. 1.25-1.5mm<br><br>7Fr. 1.75-2.0mm | Rotawire  | -           | +++             | -        | +              | +          | +++          |
| <b>OA</b>  | 6 Fr.                                   | Viperwire | -           | +++             | ++       | +              | ++         | +            |
| <b>LA</b>  | 7 Fr.                                   | Any       | ++          | ++              | +        | +++            | -          | +            |
| <b>IVL</b> | 6 Fr.                                   | Any       | +++         | +++             | +++      | +              | +          | +            |

Legend. Summary of characteristics and procedural considerations of adjunctive therapies for calcium modification
